## Electrocoagulation of azo dye containing synthetic wastewater using monopolar iron electrodes and the characterization of the sludge

A. Suresh<sup>a</sup>, S. Sathish<sup>a,\*</sup> and G. Narendrakumar<sup>b</sup>

<sup>a</sup> Department of Chemical Engineering, Sathyabama Institute of Science and Technology, Chennai 600 119, India

<sup>b</sup> Department of Biotechnology, Sathyabama Institute of Science and Technology, Chennai 600 119, India

\*Corresponding author. E-mail: sathish.chemical@sathyabama.ac.in

### Abstract

In this study, the decolourisation of Congo red dye is studied using the natural coagulant Maize Seed Powder (MSP); a suitable alternative for chemical coagulants in electro coagulation (EC) using iron electrodes. The effects of various parameters such as initial dye concentration, pH, applied voltage and time on the decolourisation of dye were studied. The cost of water treatment is increasing due to suspended and colloidal particle load. The coagulation process can be used as a primary step for water and wastewater treatment processes. Among plant materials that have been tested, the seeds of maize have been shown to be one of the most effective primary coagulants in water and wastewater treatment. The removal efficiency of the dye with and without the presence of MSP as a coagulant aid was determined. In the EC process maximum Congo red removal was achieved by using the natural coagulant MSP. Congo red (CR) decolourisation efficiency is 95.23% at a coagulant dosage of 50 mg/lit, pH of 5, operating time of 15 minutes, and a power of 40 volts with iron electrodes. In the absence of coagulant MSP, Congo red decolourisation efficiency was found to be 80.31% at pH of 5, operating time of 15 minutes, and a power of 40 volts with iron electrodes.

**Key words:** Congo red dye, electro coagulation, maize seed powder, natural coagulant

### INTRODUCTION

The Niti Aayog report reads that by 2030, India's water demand is projected to be twice the available supply. This will cause severe water scarcity. The decrease in the availability of water induces the research work for the treatment of effluents (AlHamedi *et al.* 2009). Wastewater released from textile industries can cause environmental and health hazards because of the toxic content of dyes. Most of the dyes used in the textile industry and their degradation products are carcinogenic (Dalvand *et al.* 2011). The disposal of untreated effluent into water resources alters physical and chemical properties such as pH, biological oxygen demand (BOD), chemical oxygen demand (COD) and total organic carbon (TOC) values. Currently, there is a great focus on reusing the effluent water in the dyeing process. Hence there is an urgent need to develop an economical treatment system for the treatment of wastewater, which can meet the strict quality standards (Tijani *et al.* 2014). Azo dyes are predominantly used in textile dyeing because of their chemical stability and versatility (Sathish *et al.* 2018). Dyes are widely used in textile, rubber and paper industries to color their products. The dyes are invariably left as the major waste in these industries. The removal of dyes from the effluent before they are discharged into the water sources plays a vital role in health and for sustainable environmental management (Sharma & Janveja 2008). Due to their complex chemical structures, the organic dyes are hazardous and may affect aquatic life and even the food chain. For example, congo red dye (1-Naphthalenesulfonic acid, 3, 3'-(4, 4' biphenylene bis (azo) bis 4-amino) di

sodium salt) is a benzenedene based dye, it has to metabolize into benzenedene, a known human carcinogen. Exposure to the dye has been known to cause an allergic reaction and possibly anaphylactic shock. Several conventional methods have been carried out for the treatment of textile wastewater such as adsorption, coagulation, and flocculation and chemical oxidation (Oller *et al.* 2011). The operating cost of these methods is too high (Jiang *et al.* 2010). Biological method is cheaper but the efficiency is lower because of the high concentration of toxic pollutants (Lopez-Lopez *et al.* 2016). Electrocoagulation (EC) is an emerging, eco-friendly technique for the treatment of water and wastewater without requiring the addition of chemicals to avoid secondary sludge generation (Agustina *et al.* 2005). During the past decade the process of EC has been extensively studied for the treatment of different types of industrial wastewaters, since it is less expensive, simpler to operate and generates less sludge compared to other electrochemical methods and chemical coagulation/flocculation (Papadopoulos *et al.* 2019). The hypothesis behind EC, flocculation or coagulation is same. All methods focus on the expulsion of particles from wastewater through destabilizing or neutralizing the repulsive forces that keep the particles suspended in water. The suspended particles will form larger particles that can settle down for simpler removal from water. EC uses an electrical source between metal electrodes immersed in the effluent (Kos & Perkowski 2003). Metal electrodes such as iron or aluminum are dissolved by electrical current and these metal ions, at a suitable pH, can form wide ranges of coagulated species (Wang & Xu 2012). The metal hydroxides aggregate the suspended particles and adsorb dissolved contaminants (Chen 2004). The main advantage of EC over chemical coagulation is that addition of chemical such as metal salts or polyelectrolytes. In EC the coagulants are generated by the electrolytic oxidation of an appropriate anode material which results in decreased sludge generation (Moussa *et al.* 2017). The usage of polyelectrolyte for water and wastewater treatment was limited because of its cost and uncertainties regarding chemical impurities associated with polymer synthesis. Most of the naturally occurring polyelectrolytes are of plant origin and are generally nontoxic in nature. Maize (Zeemays) is commonly known as corn in some countries. Maize seeds are easily available in the Indian region (Patel & Vashi 2012). In this study the decolourisation of Congo red from aqueous solution by using agro based natural coagulant Maize Seed Powder (MSP) in EC process was studied. The effects of operational parameters such as initial pH, potential difference, electrolysis period, and initial dye concentration were examined. Moreover, the optimization studies were carried out by using response surface methodology.

## MATERIALS AND METHODS

### Coagulant aid preparation

MSP natural coagulant was used as an aid in EC. Compared to chemical coagulants, a natural coagulant has many advantages such as biodegradability, low toxicity, low residual sludge production and low cost (de Carvalho *et al.* 2015). The mature maize seeds were washed with water and were dried at 600 °C. The dried seeds were crushed to 0.18 mm (Mesh No-BSS 85) and stored in an air tight container that can be used for further studies (Herney-Ramirez *et al.* 2010). The zeta potential of the MSP was determined by using a Zetasizer instrument at room temperature. To determine the role of surface charge, the zeta potential of the MSP has to be calculated (Boulaadjoul *et al.* 2018).

### Chemicals and reagents

The azo dye (Congo red) and the chemicals were of reagent grade. The chemicals and reagent used was of AR grade and of high purity (Bautista *et al.* 2008). All the solutions were prepared by dissolving the requisite quantity of dye in distilled water.

## Electrocoagulation process

The schematic figure of electrochemical reactor is shown in Figure 1. In spite of the simplicity of the EC setup, it requires huge electrode surface area to overcome the metal dissolution rate; this is overcome by using monopolar electrode setups in series or parallel connections. The experiments were carried out in a divided double-electrode electrochemical cell which consists of a 1,000 ml glass beaker equipped with vertical electrodes and an electrode gap of 5 cm (Bernal-Martinez *et al.* 2010). The thermostated electrocoagulator was at constant stirring speed where the cathode and anode were pieces of iron of 40 mm × 50 mm × 3 mm, which were plunged into the cell (Ganzenko *et al.* 2014). The electrodes were connected in monopolar parallel mode to a DC regulated power supply. Sigma 60 V, 10A, DC RPS was used for providing reasonable voltage was connected to the electrodes. The dye solution was stirred at 100–500 rpm by a magnetic stirrer (Sh Brand). MSP was added for the aid of EC (Aoudj *et al.* 2010).

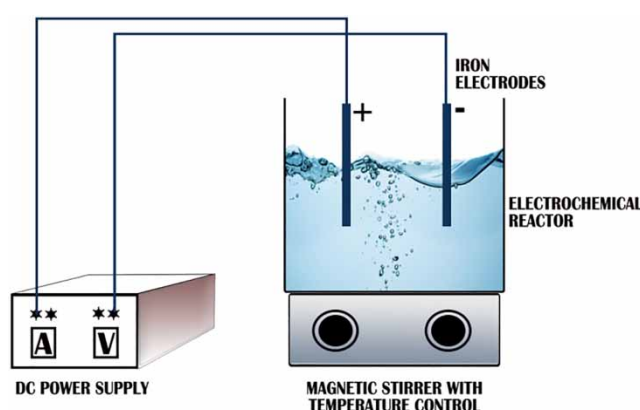

**Figure 1** | Schematic representation of electrocoagulation.

All experiments were done at constant temperature of 30 °C. The solution pH was adjusted and controlled by adding 1M NaOH or 1M HCl during experiments. Before and after EC, the electrodes were first washed with dilute HCl (5% by volume) and then rinsed with distilled water to remove the solid residue on the surfaces, dried and reweighed. For electro-coagulation experiments, about 500 mL of synthetic dye solution was introduced to the EC reactor. After that, the reactor content was stirred during experiments and at predetermined time interval, the sample was taken to determine the absorbance value using UV-Vis spectrophotometer (systronics Model-119) at 530 nm. The percentage decolourisation can be determined by using initial and final concentration of dye solution.

$$\text{Percentage decolourisation} = \frac{\text{Initial concentration} - \text{Final concentration}}{\text{Initial concentration}} \times 100$$

Several experimental parameters such as potential difference, EC time, pH and initial dye concentration were studied (Mollah *et al.* 2004).

## RESULT AND DISCUSSION

### Zeta potential of the coagulant aid

The zeta potential of the calcined MSP at 600 °C was measured by dissolving in an aqueous solution for a time period of 20, 40, and 60 min. The zeta potential of the MSP was found to be −2.26, −5.2, and −6.8 mV respectively. This result shows that the surface of the MSP particles had moderate negative

charges. It was studied that the depending on the nature of coagulant aid the negatively charged organic particles can be removed from the effluent by sweep coagulation (Boulaadjoul *et al.* 2018).

### Effect of initial dye concentration

The effect of initial dye concentration on the decolourisation efficiency has been studied in the range of 25 to 200 mg/L. As shown in Figure 2, the decolourisation efficiency decreases with the increase in initial dye concentration. Increasing the dye concentration decreases the decolourisation efficiency from 71.20% to 32.01% for MSP used as an aid in the EC process. In the absence of coagulant aid the efficiency decreases from 65% to 32.01. The decrease in dye removal efficiency with increases in initial dye concentration is due to the fact that the amounts of dissolved  $\text{Fe}^{3+}$  ions are constant at the same constant current density and time (according to Faraday's law) (Zarrabi *et al.* 2015). So, it is obvious that the lower initial dye concentration is better for higher removal efficiencies and lower consumption under present experimental conditions.

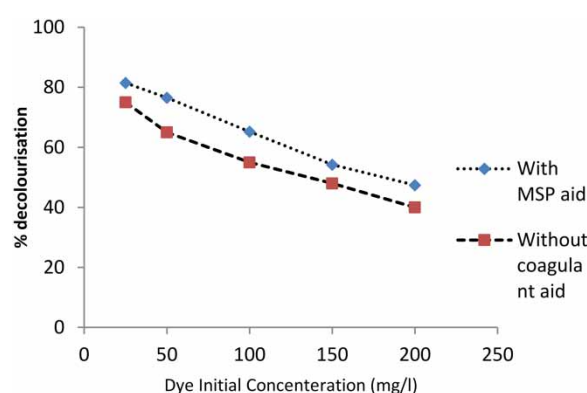

**Figure 2** | Effect of initial dye concentration on CR removal in the EC process.

### Effect of pH

The effect of pH on the decolourisation of Congo red dye by the EC process was studied with different initial pH (2 to 10). Figure 3 shows that the maximum decolourisation efficiency was at acidic pHs. At pH 6 and after 20 min contact time, 80% of dye was removed by both electrodes.

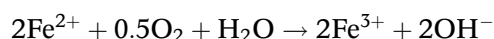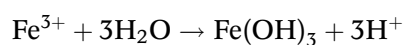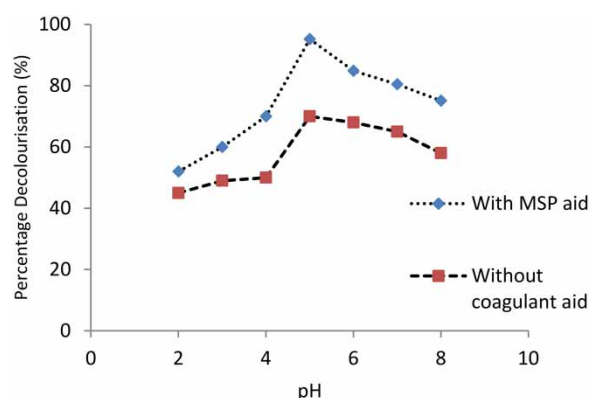

**Figure 3** | Effect of pH on CR removal by EC process.

At higher pHs the percentage of decolourisation increases may be due to the nature of the reaction between  $\text{Fe}^{3+}$  ions and hydroxide ions. At alkaline pHs, electrodes will be oxidized to  $\text{Fe}^{+3}$ . On the other hand, at an alkaline pH more hydroxyl ions will exist, thereby the hydroxides gelatinous compound is more likely to be formed, leading to increase in removal efficiency (Khandegar & Saroha 2013).

### Effect of operating time

As can be seen from Figure 3, removal efficiency was increased with increases in reaction time. After 15 min of reaction time, 98% of dye decolourisation was achieved in EC with an aid. In addition, with increase in reaction time from 5 to 25 min, dye removal efficiency increased from 35% to 92% and from 20% to 80% for iron electrode with and without MSP aid, respectively (Figure 4). According to Faraday's law, increases in electrolysis time leads to increase in  $\text{Fe}^{+3}$  species in the EC reactor and their hydroxide flocs so the EC process yield is enhanced. Further increases in time led to reductions in decolourisation efficiency, which may be due to cathode passivation, which affects the process performance (Un *et al.* 2016). Eventually, a maximum removal efficiency of 95.12% was obtained within 15 min of operating time with the presence of MSP coagulant aid.

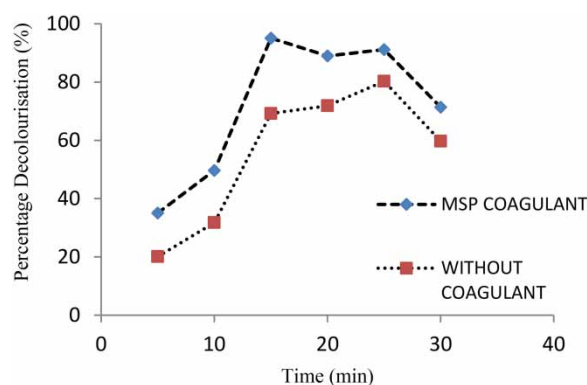

**Figure 4** | Influence of operating time on CR removal by EC.

### Effect of potential difference between electrodes

It is an important parameter which determines the rate of coagulant dosage in the EC process. The effect of potential difference was studied at 60 mg/L of dye concentration and pH 5 for 30 min. A significant increase in the dye removal efficiencies was observed up to 50 V. The amount of dissolved hydroxides increased over time, and also resulted in an increase in floc formation. Further increase in voltage meant the removal efficiency was reduced to 54%. It can also be observed that the use of MSP increased the removal efficiency to 92.04% up to 50 V and then the removal efficiency reduced to 72.14% when the voltage increase beyond 50 V. This is due to the effect of cathode passivation. In general, the amount of dissolved iron will increase in proportion to applied voltages, which can result in higher removal efficiency, but also with a proportional increase in electric energy consumption (Zarrabi *et al.* 2015). Therefore, the selection of an optimum voltage, which gives high removal efficiency with relatively low electric energy consumption, is necessary. In our study, in order to obtain direct dischargeable effluents, the experiments were performed at 40 to 50 V with the aid of MSP coagulant, which gave a 92% removal of the dye (Figure 5).

### Interaction effects and regression analysis

The interactive effect of two independent variables on percentage decolourisation can be shown on a 3D surface plot. The effect of two independent variables with another variable at fixed level on the dye

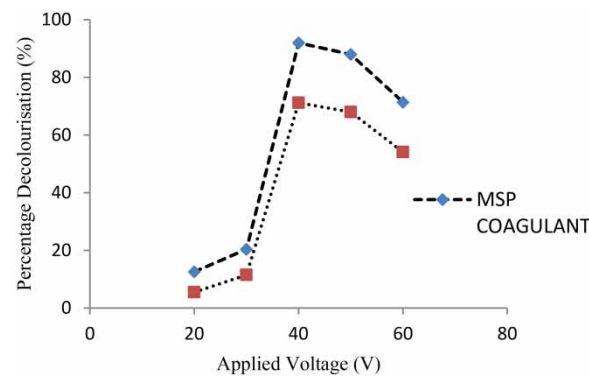

**Figure 5** | Influence of voltage between electrodes on CR removal by EC.

decolourisation was shown. **Figure 6(a)** shows the effect of two variables pH (A) and time (B) on decolourisation. As time and pH increases, percentage decolourisation increased up to the optimum level. As time increased from 5 to 25 min and pH increased from 4 to 6 an increase in percentage decolourisation was observed. After that a decrease in the percentage decolourisation was observed with increase in time and pH. The maximum percentage degradation of 95.23% was found to be pH 5, time 15 to 20 min. The further increase in pH decreases the percentage decolourisation. **Figure 6(b)** shows the interactive effect on the pH (A) and voltage (C). As pH increased from 4 to 6 and voltage increased from 20 to 40 an increase in percentage decolourisation was observed. After that a decrease in decolourisation was observed with increase in pH and voltage. The maximum percentage decolourisation was found to be at the pH of 5 and the voltage of 40 V. The effect of two variables time (B) and voltage (A) on decolourisation is shown in **Figure 6(c)**. As time and pH increases, decolourisation

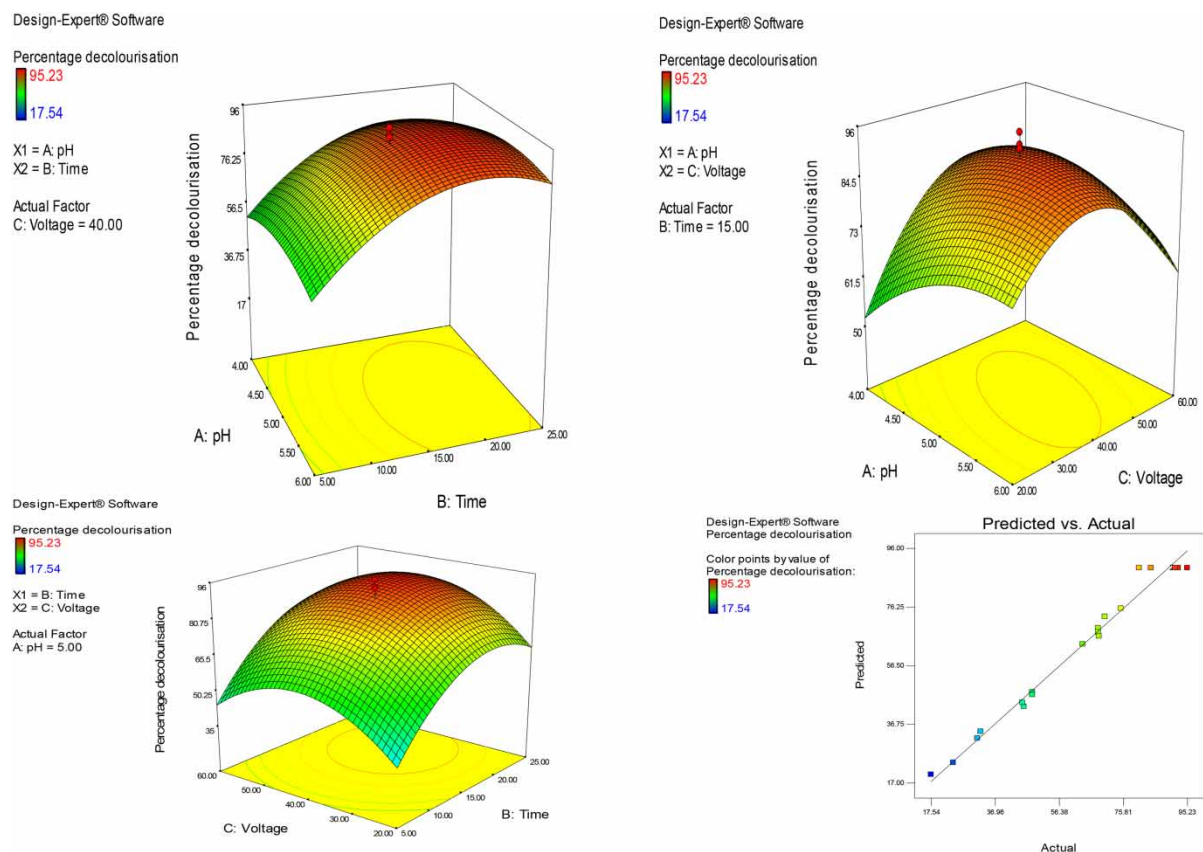

**Figure 6** | Interaction effects of process parameters on CR removal by EC.

increased up to the optimum level. As time increased from 5 to 20 min and voltage increased from 20 to 40 V an increase in percentage decolourisation was observed. After that, a decrease in the decolourisation was observed with increase in time and voltage. Validation of the statistical model was carried out; the linear correlation plot between the adjusted  $R^2$  and predicted  $R^2$  indicate that the experimental values are in good agreement with predicted values as shown. Therefore, the models were found to be adequate in representing the response data of percentage degradation of the dye, which can be further used for analysis and prediction purposes.

The regression equation contains three linear terms (A, B, C), three square terms ( $A^2$ ,  $B^2$ ,  $C^2$ ), and three cross-interaction terms (AB, AC, BC) plus 1 block term (Table 1). The empirical mathematical model was tested with ANOVA with a 5% level of significance. The statistical significance of the second-order model equation was determined by F-value (Table 2). In general, the calculated F-value should be greater than the tabulated F-value to reject the null hypothesis, where all the regression coefficients are zero.

$$\begin{aligned} \text{Percentage degradation} = & 89.42 + 2.38A + 13.85B + 3.7C \\ & + 0.69AB - 7.72AC + 1.31BC - 6.23A^2 - 16.367B^2 - 17.28C^2 \end{aligned}$$

**Table 1** | Coded value of physical parameters

| Code | Parameter      | Low Range | High Range |
|------|----------------|-----------|------------|
| A    | pH             | 4         | 6          |
| B    | Time (min)     | 15        | 25         |
| C    | Voltage (Volt) | 20        | 60         |

**Table 2** | Design table for Congo red decolourisation

| Run | A:pH | B:Time min | C:Voltage volt | Percentage decolourisation (%) |           |
|-----|------|------------|----------------|--------------------------------|-----------|
|     |      |            |                | Actual                         | Predicted |
| 1   | 6    | 25         | 60             | 63.54                          | 63.75     |
| 2   | 5    | 15         | 6.36           | 32.58                          | 34.31     |
| 3   | 5    | 31.82      | 40             | 68.47                          | 66.42     |
| 4   | 6    | 25         | 20             | 68.21                          | 69.18     |
| 5   | 5    | 15         | 40             | 80.64                          | 89.42     |
| 6   | 5    | 15         | 73.63          | 48.24                          | 46.76     |
| 7   | 5    | 15         | 40             | 95.23                          | 89.42     |
| 8   | 6.68 | 15         | 40             | 75.12                          | 75.80     |
| 9   | 5    | 15         | 40             | 92.45                          | 89.42     |
| 10  | 6    | 5          | 60             | 31.57                          | 32.06     |
| 11  | 5    | 15         | 40             | 91.54                          | 89.42     |
| 12  | 5    | 1.81       | 40             | 17.54                          | 19.84     |
| 13  | 4    | 5          | 60             | 45.25                          | 44.11     |
| 14  | 6    | 5          | 20             | 45.67                          | 42.71     |
| 15  | 4    | 25         | 60             | 70.25                          | 73.04     |
| 16  | 4    | 5          | 20             | 24.26                          | 23.87     |
| 17  | 5    | 15         | 40             | 92.45                          | 89.42     |
| 18  | 5    | 15         | 40             | 84.25                          | 89.42     |
| 19  | 3.31 | 15         | 40             | 68.21                          | 67.77     |
| 20  | 4    | 25         | 20             | 48.24                          | 47.58     |

Multiple regression analysis was carried out considering the full quadratic model equation on the responses to evaluate the adequacy of fit and results are reported in Table 3. The coefficient of determination ( $R^2$  values) for the model equation are  $R^2 = 0.982481$ , adjusted  $R^2 = 0.9667$  and predicted  $R^2 = 0.954246$  for the responses were reported. These values suggested that the predicted values are in a linear relation with experiment values (Table 4).

**Table 3** | Analysis of variance (ANOVA) for dye removal

| Source         | Sum of Squares | df       | Mean Square         | F Value  | p-value Prob> F |                 |
|----------------|----------------|----------|---------------------|----------|-----------------|-----------------|
| Model          | 10,957.67      | 9        | 1,217.519           | 62.31345 | <0.0001         | significant     |
| A-pH           | 77.87222       | 1        | 77.87222            | 3.985553 | 0.0738          |                 |
| B-Time         | 2,619.589      | 1        | 2,619.589           | 134.0723 | <0.0001         |                 |
| C-Voltage      | 187.2326       | 1        | 187.2326            | 9.582694 | 0.0113          |                 |
| AB             | 3.822613       | 1        | 3.822613            | 0.195644 | 0.6677          |                 |
| AC             | 476.9416       | 1        | 476.9416            | 24.41019 | 0.0006          |                 |
| BC             | 13.65031       | 1        | 13.65031            | 0.698632 | 0.4228          |                 |
| A <sup>2</sup> | 559.9572       | 1        | 559.9572            | 28.65899 | 0.0003          |                 |
| B <sup>2</sup> | 3,860.126      | 1        | 3,860.126           | 197.5639 | <0.0001         |                 |
| C <sup>2</sup> | 4,305.044      | 1        | 4,305.044           | 220.3351 | <0.0001         |                 |
| Residual       | 195.3862       | 10       | 19.53862            |          |                 |                 |
| Lack of Fit    | 34.9569        | 5        | 6.991381            | 0.217896 | 0.9400          | not significant |
| Pure Error     | 160.4293       | 5        | 32.08587            |          |                 |                 |
| Cor Total      | 11,153.06      | 19       |                     |          |                 |                 |
| Std. Dev.      |                | 4.420252 | R <sup>2</sup>      |          | 0.982481        |                 |
| Mean           |                | 62.1855  | Adj R <sup>2</sup>  |          | 0.966715        |                 |
| C.V. %         |                | 7.108171 | Pred R <sup>2</sup> |          | 0.954246        |                 |
| PRESS          |                | 510.2992 | Adeq Precision      |          | 22.2624         |                 |

**Table 4** | Optimized values of physical parameters

| Parameter      | Experimental           | Simulation      |
|----------------|------------------------|-----------------|
| pH             | 5 (Figure 3) acidic pH | 5 (Figure 6)    |
| Time (min)     | 15 (Figure 4)          | 15 (Figure 6)   |
| Voltage (Volt) | 40–50 V (Figure 5)     | 40 V (Figure 6) |

### FTIR analysis

The FTIR spectra of dye solution before and after treatment are shown (Figure 7). The spectra showed the peaks at 3,777.04, 3,483, 3,008.87, 2,357.63, 1,690.05, 1,482.88, 1,447.66, and 1,058.28  $\text{cm}^{-1}$ , which correspond to aromatic esters, tertiary alcohol,  $\text{NH}^+$ ,  $\text{N}=\text{N}$ ,  $\text{S}-\text{O}$  and  $\text{CHO}$  stretching, respectively. The FTIR spectra analysis of the dye after EC observed five absorption bands between 4,000 and 500  $\text{cm}^{-1}$  shown in Figure 7. Vibrant changes were observed at the 1,590–1,010  $\text{cm}^{-1}$  position. The initial peaks of 3,391.24  $\text{cm}^{-1}$ , 2,925  $\text{cm}^{-1}$ , 2,358  $\text{cm}^{-1}$ , 1,653.24  $\text{cm}^{-1}$  and 1,432 correspond to amide groups and carboxylic acids formed during the process.

### SEM characterization

The sludge resulting from EC using iron, at an initial dye concentration of 100 mg/L, was collected periodically to investigate the electrostatic characteristics of the sludge. The sludge was dewatered

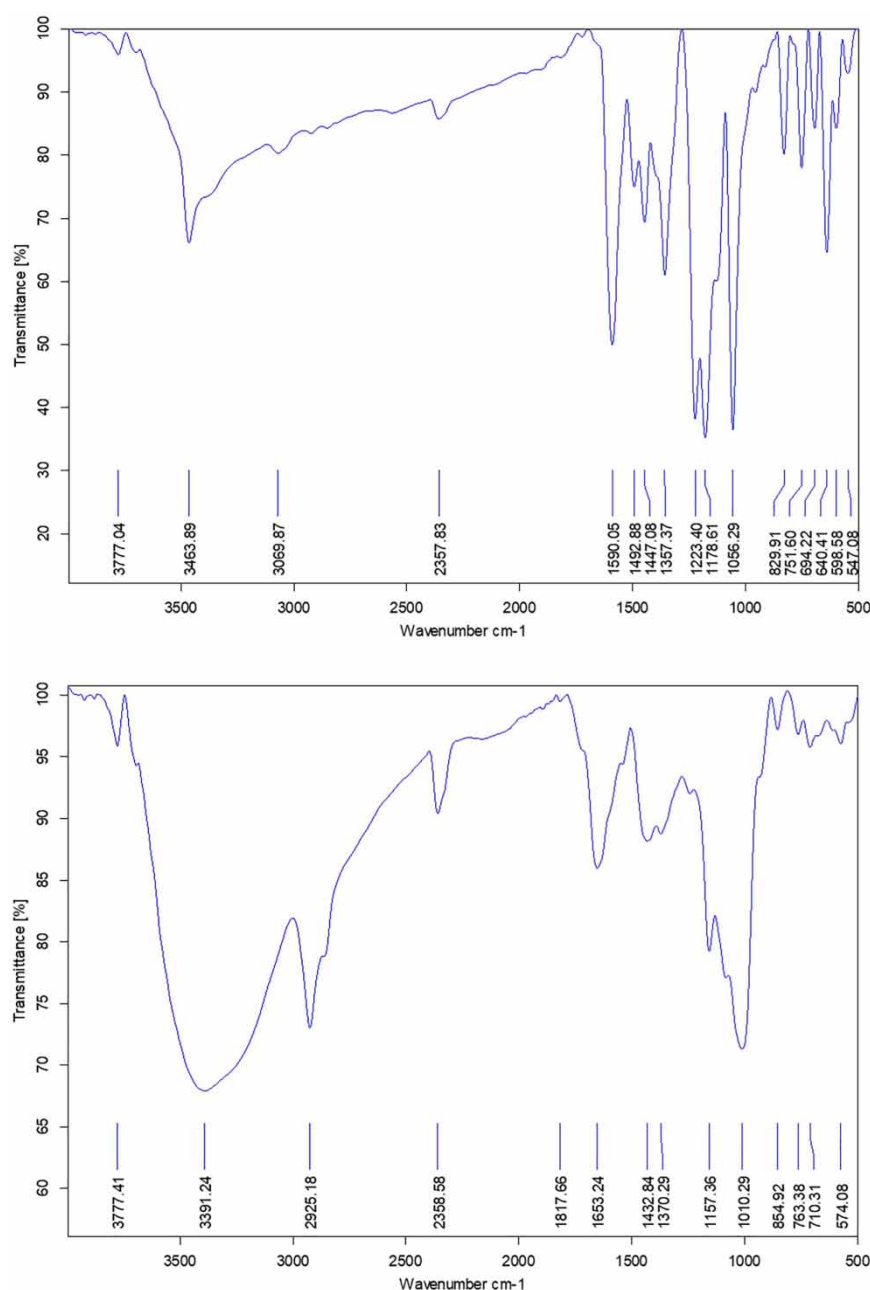

**Figure 7** | FTIR spectrum of Congo red dye powder (before and after EC).

by filtration, washed with demineralised water and freeze-dried. SEM images and their corresponding elemental mapping results of EC sludge, generated at an initial dye concentration of 100 mg/L, are presented in [Figure 8](#). Elemental mapping results show that more carbon and oxygen were found in the SEM images of sludge. Furthermore, the EDS analysis shows the weight fraction of the total weight of all the atoms in the sample (weight %). This indicates that dye was removed by coprecipitation by occlusion, where it was physically trapped inside the floc ([Kima \*et al.\* 2013](#)).

## CONCLUSION

Our objective to enhance the percentage decolourisation of Congo red, using MSP as a natural coagulant aid in the EC process was studied. The obtained results show that the removal efficiency reached

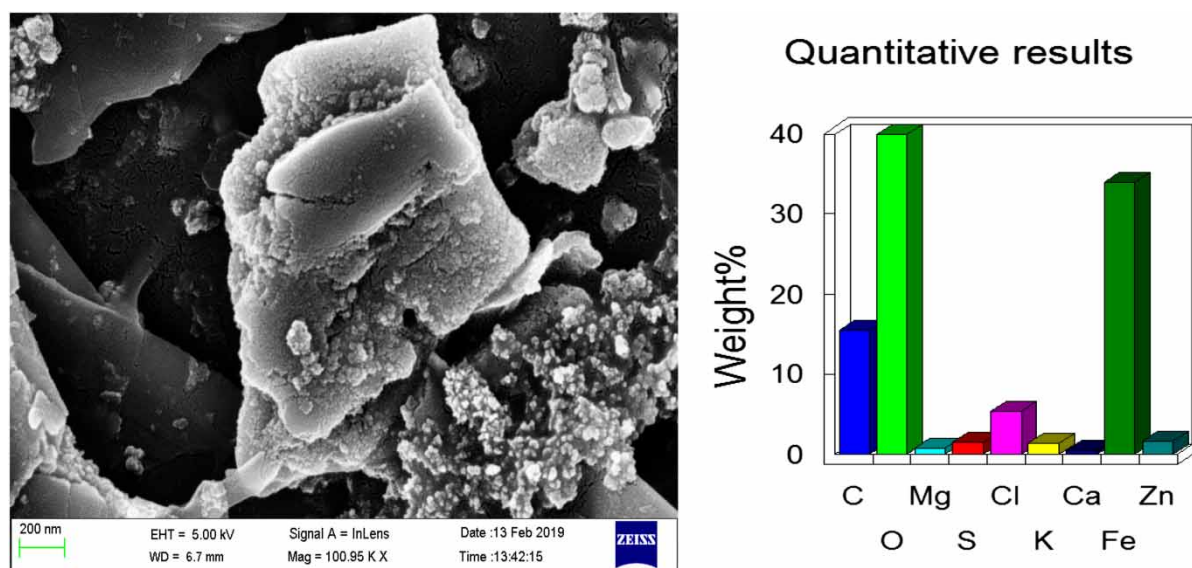

**Figure 8** | SEM image of the sludge (Congo red dye + MSP coagulant) (after EC).

95.23% by using a MSP coagulant dosage of 300 mg/l. Furthermore, the process parameters were optimized by using RSM to achieve maximum decolourisation and it was found to be at the pH of 5, operating time of 15 to 20 minute, 40 Volt with iron electrodes. The process optimization of these parameters was also studied and highest decolourisation was achieved. FTIR analysis results showed that the protein content present in the MSP at the absorption band  $1,653.24\text{ cm}^{-1}$  reacted with the dye, thereby achieving decolourisation. It can be inferred that the presence of MSP coagulant aids the decolourisation efficiency of Congo red decolourisation by the EC process.

## REFERENCES

- Agustina, T. E., Ang, H. M. & Vareek, V. K. 2005 [A review of synergistic effect of photocatalysis and ozonation on wastewater treatment](#). *Journal of Photochemistry and Photobiology C: Photochemistry Reviews* **6**, 264–273. DOI:10.1016/j.jphotochemrev.2005.12.003.
- AlHamed, F. H., Rauf, M. A. & Salman Ashraf, S. 2009 [Degradation studies of Rhodamine B in the presence of UV/H<sub>2</sub>O<sub>2</sub>](#). *Desalination* **239**, 159–166. DOI:10.1016/j.desal.2008.03.016.
- Aoudj, S., Khelifa, A., Drouiche, N., Hecini, M. & Hamitouche, H. 2010 [Electro coagulation process applied to wastewater containing dyes from textile industry](#). *Chemical Engineering and Processing* **49**, 1176–1188.
- Bautista, P., Mohedano, A. F., Casas, J. A., Zazo, J. A. & Rodriguez, J. J. 2008 [An overview of the application of Fenton oxidation to industrial wastewaters treatment](#). *Journal of Chemical Technology and Biotechnology* **83**(10), 1323–1338. DOI: 10.1002/jctb.1988.
- Bernal-Martinez, L. A., Barrera-Diaz, C., Solis-Morelos, C. & Reyna, N. 2010 [Synergy of electrochemical and ozonation processes in industrial wastewater treatment](#). *Chemical Engineering Journal* **165**(1), 71–77. <https://doi.org/10.1016/j.cej.2010.08.062>.
- Boulaadjoul, S., Zemmouri, H., Bendjama, Z. & Drouiche, N. 2018 [A novel use of \*Moringa oleifera\* seed powder in enhancing the primary treatment of paper mill effluent](#). *Chemosphere* **206**, 142–149. DOI: 10.1016/j.chemosphere.2018.04.123.
- Chen, G. 2004 [Electrochemical technologies in wastewater treatment](#). *Separation and Purification Technology* **38**, 11–18.
- Dalvand, A., Gholami, M., Joneidi, A. & Mahmoodi, N. M. 2011 [Dye removal, energy consumption and operating cost of electrocoagulation of textile wastewater as a clean process](#). *Clean-Soil, Air, Water* **39**(7), 665–675.
- de Carvalho, H. P., Huang, J., Ni, J., Zhao, M., Yang, X. & Wang, X. 2015 [Removal of acid black 1 and basic red 2 from aqueous solutions by electrocoagulation/\*Moringa oleifera\* seed adsorption coupling in a batch system](#). *Water Science and Technology* **2**(2), 203–210.
- Ganzenko, O., Huguenot, D., Van Hullebusch, E. D., Esposito, G. & Oturan, M. A. 2014 [Electrochemical advanced oxidation and biological processes for wastewater treatment: a review of the combined approaches](#). *Environmental Science and Pollution Research International* **21**(14), 8493–8524. doi: 10.1007/s11356-014-2770-6.
- Herney-Ramirez, J., Vicente, M. A. & Madeira, L. M. 2010 [Heterogeneous photo-Fenton oxidation with pillared clay-based catalysts for wastewater treatment](#). *Applied Catalysis B: Environmental* **98**, 10–26. DOI:10.1016/j.apcatb.2010.05.004.

- Jiang, C., Pang, S., Ouyang, F., Ma, J. & Jiang, J. 2010 A new insight into Fenton and Fenton like processes for water treatment. *Journal of Hazardous Materials* **174**(1–3), 813–817. DOI: 10.1016/j.jhazmat.2009.09.125.
- Khandegar, V. & Saroha, A. K. 2013 Electrocoagulation for the treatment of textile industry effluent – A review. *Journal of Environmental Management* **128**, 949–955.
- Kima, D.-G., Palacios, R. J. S. & Ko, S.-O. 2013 Characterization of sludge generated by electrocoagulation for the removal of heavy metals. *Desalination and Water Treatment* **52**(4–6), 909–919. doi:10.1080/19443994.2013.826776.
- Kos, L. & Perkowski, J. 2003 Decolorization of real textile wastewater with advanced oxidation processes. *Fibres and Textiles in Eastern Europe* **11**(4–43), 81–85.
- Lopez-Lopez, C., Martin-Pascual, J., Leyva-Diaz, J. C., Martinez-Toledo, M. V., Munio, M. M. & Poyatos, J. M. 2016 Combined treatment of textile wastewater by coagulation–flocculation and advanced oxidation processes. *Desalination and Water Treatment* **57**(30), 13987–13994. DOI: 10.1080/19443994.2015.1063013.
- Mollah, M. Y. A., Morkovsky, P., Gomes, J. A. G., Kesmez, M., Parga, J. & Cocke, D. L. 2004 Fundamentals, present and future perspectives of electro coagulation. *Journal of Hazardous Materials* **B**(114), 199–204.
- Moussa, D. T., El-Naas, M. H., Nasser, M. & Al-Marri, M. J. 2017 A comprehensive review of electrocoagulation for water treatment: potentials and challenges. *Journal of Environmental Management* **186**, 24–41. doi:10.1016/j.jenvman.2016.10.032.
- Oller, I., Malato, S. & Sanchez-Perez, J. A. 2011 Combination of advanced oxidation processes and biological treatments for wastewater decontamination – A review. *Science of the Total Environment* **409**(20), 4141–4166.
- Papadopoulos, K. P., Argyriou, R., Economou, C. N., Charalampous, N., Dailianis, S., Tatoulis, T. I. & Vayenas, D. V. 2019 Treatment of printing ink wastewater using electrocoagulation. *Journal of Environmental Management* **237**, 442–448. DOI:10.1016/j.jenvman.2019.02.080.
- Patel, H. & Vashi, R. T. 2012 Removal of Congo Red dye from its aqueous solution using natural coagulants. *Journal of Saudi Chemical Society* **16**, 131–136.
- Sathish, S., Vikram, S. & Suraj, R. 2018 Effectiveness of turbidity removal from synthetic and tannery wastewater by using seeds of a natural coagulant citrullus lanatus. *Nature Environment and Pollution Technology* **17**(2), 551–553.
- Sharma, J. & Janveja, B. 2008 A study on removal of Congo Red dye from the effluents of textile industry using rice husk carbon activated by steam. *Rasayan Journal of Chemistry* **1**(4), 936–942.
- Tijani, J. O., Fatoba, O. O., Madzivire, G. & Petrik, L. F. 2014 A review of combined advanced oxidation technologies for the removal of organic pollutants from water. *Water, Air, Soil & Pollution* **225**(2102), 1–46. DOI: 10.1007/s11270-014-2102-y.
- Un, U. T., Topal, S. & Ates, F. 2016 Electrocoagulation of tissue paper wastewater and an evaluation of sludge for pyrolysis. *Desalination and Water Treatment* **57**(59), 1–10. DOI: 10.1080/19443994.2016.1196153.
- Wang, J. L. & Xu, L. J. 2012 Advanced oxidation processes for wastewater treatment: formation of hydroxyl radical and application. *Critical Reviews in Environmental Science and Technology* **42**(3), 251–306. DOI: 10.1080/10643389.2010.507698.
- Zarrabi, M., Alizadeh, M., Ghahramani, E. & Hashemi, S. 2015 Efficient de-colorization of methylene blue by electro-coagulation method: comparison of iron and aluminum electrode. *Iranian Journal of Chemistry & Chemical Engineering* **34**(1), 39–47.
